# Supplementary material
Source: PubMed Central journal article supplement (PMC3485959)
Supplement: AEM.01815-12_zam999103832so1.pdf [file AEM.01815-12_zam999103832so1.pdf]

## **Supplemental Materials for Staley, Z. et al.**

### **Additional Methods**

#### *Microcosm Establishment*

For both experiments, microcosms were established in a greenhouse at the University of South Florida Botanical Gardens (Tampa, FL). In the first, dark experiment, microcosms consisted of 11.3 L Rubbermaid plastic trash cans with opaque sides (29.97 x 22.86 x 33.65cm) containing 1 L of sediment disinfected by baking at 176.67°C and 2 L of autoclaved deionized water. These microcosms were covered with aluminum foil to prevent light penetration. In the second, light experiment, microcosms consisted of 2L glass beakers containing 0.5 L of sediment disinfected as above and 1.5 L of autoclaved de-ionized water. In both experiments, target bacteria were inoculated at densities of approximately  $10^7$  CFU/100 ml and target viruses at densities of approximately  $10^3$  copy numbers/ml.

#### *Bacterial Enumeration*

Culture-based methods of bacterial enumeration utilized selective differential media for each bacterial target, *E. coli* was enumerated on mTEC agar following incubation for 2 hours at 35°C and then at 44.5°C for 22 h (9), *Enterococcus faecalis* was enumerated on mEI agar after 24 h incubation at 41°C (8), *E. coli* O157:H7 was enumerated on Sorbitol MacConkey agar following 24 h incubation at 37°C (6), and *S. enterica* was enumerated on XLT-4 agar following incubation for 24 h at 37°C (2). Quantification via qPCR (performed only for the dark microcosms) utilized the primers and probes found in Table S1.

### *Growth Curves*

Growth curves were conducted by inoculating an isolated colony of *E. coli* ATCC 9637, *Ent. faecalis* ATCC 19433, *S. enterica* serovar Typhimurium, or *E. coli* O157:H7 EDL 933 into a centrifuge tube containing 20ml of M9 Minimal Media (supplemented with 12g/L of yeast extract for *Ent. faecalis* growth) and incubated for 24h at 37°C. The optical density at 600 nm (OD<sub>600</sub>) was measured for each overnight culture using a NanoDrop 2000 Spectrophotometer (Thermo Scientific) and then diluted 1:20 into individual tubes containing M9 Minimal Media. The OD<sub>600</sub> was measured for each of the tubes to get a baseline prior to agrochemical addition. Three replicates cultures of M9 amended with each singular agrochemical treatment (water and solvent controls, inorganic fertilizer, atrazine, malathion, or chlorothalonil) were established at 1x expected environmental concentration (EEC). The OD<sub>600</sub> was measured after 1 h and then after every subsequent 30 min for ~5 h. This procedure was repeated until growth curves had been conducted for all target bacteria at 1x and 2x EEC. Growth curves were also conducted as above for each of the four target bacteria as well as *E. coli* WW6 (isolated from a wastewater treatment plant in Tampa, FL) using agrochemical treatments including a water control, atrazine, atrazine-2-hydroxy, cyanuric acid, and atrazine exposed to 365 nm UV lamps for ~18h.

**Table S1.** Primers and probes used for qPCR analysis.

| Target                               | Orientation | Primer or Probe | Sequence (5'-3')                                     | Reference |
|--------------------------------------|-------------|-----------------|------------------------------------------------------|-----------|
| HPyV                                 | Forward     | SM2             | AGT CTT TAG GGT CTT CTA CCT TT                       | (5)       |
|                                      | Reverse     | P6              | GGT GCC AAC CTA TGG AAC AG                           |           |
|                                      | Probe       | KGJ3            | (FAM)-TCA TCA CTG GCA AAC AT-(MGBNFQ)                |           |
| Adenovirus                           | Forward     | JTVXF           | GGA CGC CTC GGA GTA CCT GAG                          | (1)       |
|                                      | Reverse     | JTVXR           | ACI GTG GGG TTT CTG AAC TTG TT                       |           |
|                                      | Probe       | JTVXP           | (FAM)-CTG GTG CAG TTC GCC CGT GCC A-(MGBNFQ)         |           |
| <i>E. coli</i><br>O157:H7            | Forward     | EcoOH-F         | TCG AGC GGA CCA TGA TCA                              | (3, 7)    |
|                                      | Reverse     | EcoOH-R         | GGC GGC GTC TGA GAT AAC A                            |           |
|                                      | Probe       | EcoOH-PR        | (FAM)-AGA ACT TCA AAT CCA TCA TT-(MGBNFQ)            |           |
| <i>Salmonella</i><br><i>enterica</i> | Forward     | Sal-F           | CGT TTC CTG CGG TAC TGT TAA TT                       | (3, 7)    |
|                                      | Reverse     | Sal-R           | AGA CGG CTG GTA CTG ATC GAT AA                       |           |
|                                      | Probe       | Sal-probe       | (FAM)-CCA CGC TCT TTC GTC T-(MGBNFQ)                 |           |
| <i>E. coli</i>                       | Forward     | Eco-F           | GTC CAA AGC GGC GAT TTG                              | (3, 7)    |
|                                      | Reverse     | Eco-R           | CAG GCC AGA AGT TCT TTT TCC A                        |           |
|                                      | Probe       | Eco-PR          | (FAM)-ACG GCA GAG AAG GTA-(MGBNFQ)                   |           |
| Enterococcus                         | Forward     | EnteroF1A       | GAG AAA TTC CAA ACG AAC TTG                          | (4)       |
|                                      | Reverse     | EnteroR1        | CAG TGC TCT ACC TCC ATC ATT                          |           |
|                                      | Probe       | GPL813TQ        | (FAM)-TGG TTC TCT CCG AAA TAG CTT TAG GGC TA-(TAMRA) |           |

**Table S2.** Correlations of bacterial concentrations obtained via culture-dependent methods vs. qPCR at T24 and T168. Pearson  $r$  correlation coefficient is shown.

| <b>Target</b>          | <b>Water</b> |              | <b>Sediment</b> |              |
|------------------------|--------------|--------------|-----------------|--------------|
|                        | <b>T 24</b>  | <b>T 168</b> | <b>T 24</b>     | <b>T 168</b> |
| <i>E. coli</i>         | 0.86         | 0.70         | 0.83            | 0.65         |
| <i>Ent. faecalis</i>   | 0.66         | 0.45         | 0.41            | 0.65         |
| <i>E. coli</i> O157:H7 | 0.84         | 0.60         | 0.67            | 0.61         |
| <i>S. enterica</i>     | 0.70         | 0.80         | 0.72            | 0.72         |

**Table S3.** Results of multivariate analysis of variance for the *Dark Microcosms* examining the effects of spatial block, agrochemical treatment, and sampling date on the density, quantified by qPCR, of *E. coli*, *Ent. faecalis*, *E. coli* O157:H7, *S. enterica*, HPyV, and adenovirus in the water column.

| Effect         | Wilk's <i>F</i> | <i>df</i> effect | <i>df</i> error | <i>P</i> |
|----------------|-----------------|------------------|-----------------|----------|
| Intercept      | 1192.23         | 6                | 29              | <0.001   |
| Block          | 7.43            | 18               | 85.51           | <0.001   |
| Treatment      | 1.32            | 60               | 157             | 0.09     |
| Sampling date  | 45.38           | 12               | 23              | <0.001   |
| Date*Block     | 16.55           | 36               | 68.68           | <0.001   |
| Date*Treatment | 1.25            | 120              | 193.24          | 0.09     |

**Table S4.** Results of multivariate analysis of variance for the *Light Microcosms* examining the effects of spatial block, agrochemical treatment, and sampling date on the density of *E. coli*, *Ent. faecalis*, *E. coli* O157:H7, and *S. enterica* in the water column.

| Effect         | Wilk's <i>F</i> | <i>df</i> effect | <i>df</i> error | <i>P</i> |
|----------------|-----------------|------------------|-----------------|----------|
| Intercept      | 32427.80        | 4                | 12              | <0.001   |
| Block          | 76.71           | 12               | 32.04           | <0.001   |
| Treatment      | 1.21            | 20               | 40.75           | 0.30     |
| Sampling date  | 587.48          | 8                | 8               | <0.001   |
| Date*Block     | 263.18          | 24               | 23.80           | <0.001   |
| Date*Treatment | 1.29            | 40               | 37.67           | 0.22     |

**Table S5.** Growth rates of bacteria cultures while exposed to agrochemicals. Error bars represent standard deviations.

| Treatment          | Concentration | <i>E. coli</i> 9637           |                    | <i>E. coli</i> WW6            |                    | <i>E. coli</i> O157:H7        |                    | <i>Ent. faecalis</i> 19433    |                    | <i>S. enterica</i>            |                    |
|--------------------|---------------|-------------------------------|--------------------|-------------------------------|--------------------|-------------------------------|--------------------|-------------------------------|--------------------|-------------------------------|--------------------|
|                    |               | Generation Time <sup>-1</sup> | Standard Deviation |
| Water              | 1x EEC        | 6.5E-01                       | 1.03E-01           |                               |                    | 9.6E-01                       | 8.17E-02           | 7.5E-01                       | 8.16E-02           | 7.0E-01                       | 9.76E-02           |
|                    | 2x EEC        | 8.5E-01                       | 9.62E-02           |                               |                    | 6.1E-01                       | 2.00E-02           | 7.7E-01                       | 2.71E-02           | 9.3E-01                       | 3.39E-02           |
|                    | Intermediates | 1.1E+00                       | 5.83E-02           | 6.7E-01                       | 2.62E-02           | 7.2E-01                       | 7.18E-02           | 5.9E-01                       | 3.47E-02           | 1.0E+00                       | 1.50E-01           |
| Solvent            | 1x EEC        | 6.4E-01                       | 9.18E-02           |                               |                    | 1.0E+00                       | 1.13E-01           | 3.9E-01                       | 2.24E-01           | 7.5E-01                       | 3.58E-02           |
|                    | 2x EEC        | 8.2E-01                       | 3.81E-02           |                               |                    | 6.3E-01                       | 4.66E-02           | 7.1E-01                       | 3.11E-02           | 8.4E-01                       | 2.83E-02           |
| Fertilizer         | 1x EEC        | 6.2E-01                       | 5.86E-02           |                               |                    | 9.5E-01                       | 2.10E-01           | 6.0E-01                       | 1.02E-01           | 6.8E-01                       | 6.96E-02           |
|                    | 2x EEC        | 7.9E-01                       | 3.59E-02           |                               |                    | 6.1E-01                       | 4.66E-02           | 7.1E-01                       | 3.58E-02           | 8.3E-01                       | 3.70E-02           |
| Malathion          | 1x EEC        | 6.3E-01                       | 1.04E-01           |                               |                    | 1.0E+00                       | 1.13E-01           | 5.4E-01                       | 1.06E-01           | 7.1E-01                       | 9.98E-02           |
|                    | 2x EEC        | 8.2E-01                       | 5.69E-02           |                               |                    | 6.0E-01                       | 2.92E-02           | 7.1E-01                       | 3.12E-02           | 8.0E-01                       | 2.21E-02           |
| Chlorothalonil     | 1x EEC        | 6.8E-01                       | 9.68E-02           |                               |                    | 9.0E-01                       | 1.90E-02           | 5.5E-01                       | 1.54E-01           | 7.6E-01                       | 1.15E-01           |
|                    | 2x EEC        | 7.7E-01                       | 3.10E-02           |                               |                    | 6.4E-01                       | 7.60E-02           | 6.6E-01                       | 6.53E-02           | 1.0E+00                       | 1.26E-01           |
| Atrazine           | 1x EEC        | 6.3E-01                       | 7.73E-02           |                               |                    | 9.0E-01                       | 7.31E-02           | 6.5E-01                       | 2.10E-01           | 7.5E-01                       | 1.36E-01           |
|                    | 2x EEC        | 8.3E-01                       | 1.08E-01           |                               |                    | 5.3E-01                       | 3.50E-02           | 7.2E-01                       | 8.86E-02           | 7.9E-01                       | 1.70E-02           |
|                    | Intermediates | 1.1E+00                       | 4.89E-02           | 7.2E-01                       | 2.88E-02           | 6.9E-01                       | 1.56E-02           | 5.8E-01                       | 1.78E-02           | 1.0E+00                       | 9.04E-02           |
| UV-atrazine        | Intermediates | 9.3E-01                       | 4.13E-02           | 7.6E-01                       | 3.22E-02           | 7.1E-01                       | 4.47E-03           | 5.5E-01                       | 4.14E-02           | 9.6E-01                       | 4.57E-02           |
| Atrazine-2-hydroxy | Intermediates | 9.1E-01                       | 5.79E-02           | 7.1E-01                       | 5.85E-02           | 6.8E-01                       | 4.88E-02           | 5.4E-01                       | 5.37E-02           | 8.6E-01                       | 2.22E-02           |
| Cyanuric Acid      | Intermediates | 9.9E-01                       | 3.01E-02           | 6.3E-01                       | 2.18E-02           | 6.9E-01                       | 3.70E-02           | 5.9E-01                       | 2.02E-02           | 8.9E-01                       | 2.44E-02           |

1. **Jothikumar, N., T. L. Cromeans, V. R. Hill, X. Lu, M. D. Sobsey, and D. D. Edrman.** 2005. Quantitative real-time PCR assays for detection of human adenoviruses and identification of serotypes 40 and 41. *Appl Environ Microbiol* **71**:3131-6.
2. **Kornacki, J. L., J. B. Gurtler, Z. Yan, and C. M. Cooper.** 2003. Evaluation of several modifications of an ecometric technique for assessment of media performance. *J Food Prot* **66**:1727-32.
3. **Lee, D.-Y., K. Shannon, and L. A. Beaudette.** 2005. Detection of bacterial pathogens in municipal wastewater using an oligonucleotide microarray and real-time quantitative PCR. *J Microbiol Methods* **65**:453-67.
4. **Ludwig, W., and K. H. Schleifer.** 2000. How quantitative is quantitative PCR with respect to cell counts? *Syst Appl Microbiol* **23**:556-62.
5. **McQuaig, S. M., T. M. Scott, J. O. Lukasik, J. H. Paul, and V. J. Harwood.** 2009. Quantification of human polyomaviruses JC Virus and BK Virus by TaqMan quantitative PCR and comparison to other water quality indicators in water and fecal samples. *Appl Environ Microbiol* **75**:3379-88.
6. **Novicki, T. J., J. A. Daly, S. L. Mottice, and K. C. Carroll.** 2000. Comparison of sorbitol MacConkey agar and a two-step method which utilizes enzyme-linked immunosorbent assay toxin testing and a chromogenic agar to detect and isolate enterohemorrhagic *Escherichia coli*. *J Clin Microbiol* **38**:547-51.
7. **Shannon, K. E., D. Y. Lee, J. T. Trevors, and L. A. Beaudette.** 2007. Application of real-time quantitative PCR for the detection of selected bacterial pathogens during municipal wastewater treatment. *Sci Total Environ* **382**:121-9.
8. **U. S. Environmental Protection Agency.** 2002. Method 1600: enterococci in water by membrane filtration using membrane-enterococcus indoxy-B-D-glucoside agar (mEI). EPA 821-R-02-022.
9. **U. S. Environmental Protection Agency.** 2002. Method 1603: *Escherichia coli* (*E.coli*) in water by membrane filtration using modified membrane-thermotolerant *Escherichia coli* agar (modified mTEC). EPA 821-R-02-023.
